# Supplementary material for: A novel algorithm for better distinction of primary mucinous ovarian carcinomas and mucinous carcinomas metastatic to the ovary
Source: PubMed Central journal article supplement (PMC6515884; doi:10.1007/s00428-018-2504-0), 2019-01-10
Supplement: 428_2018_2504_MOESM3_ESM.pdf [file 428_2018_2504_MOESM3_ESM.pdf]

The following formula was used to calculate a relative score per size value ranging from 0 to 100:

$$Score(size) = 100 * \left( \frac{(Size * Bsize) - S1}{SN - S1} \right)$$

For age a score relative to size was calculated per age value using the formula:

$$Score(age) = 100 * \left( \frac{Age * Bage}{SN - S1} \right)$$

with SN being the largest size and S1 being the smallest size in the cohort multiplied by  $B_{size}$ . Per patient, these scores were added to yield a total score  $Score_{(size+age)}$ .

For size, a relative score was calculated per size value ranging from 0 to 100 using the following formula:

$$Score(size) = 100 * \left( \frac{(Size - 1) * 0.154}{9.086 - 0.154} \right)$$

For age a score relative to size was calculated per age value using the following formula

$$Score(age) = 100 * \left( \frac{Age * -0.033}{9.086 - 0.154} \right)$$

These scores are shown in Supplemental Tables 1 and 2. Per patient, these scores were added to yield a total score  $Score_{(size+age)}$ .
