# Supplementary material for: A novel algorithm for better distinction of primary mucinous ovarian carcinomas and mucinous carcinomas metastatic to the ovary
Source: Springer Nature journal article supplement (doi:10.1007/s00428-018-2504-0), 2019-01-10
Supplement: MOESM1 [file 16390042]

| <b>Imputed variables</b> | <b>Variables used for imputation</b> |
|--------------------------|--------------------------------------|
| Largest size             | Age                                  |
| Laterality               | Origin (metastasis or primary)       |
|                          | Location of primary tumor            |
|                          | Histology                            |
|                          | Largest size                         |
|                          | Laterality                           |
