# Supplementary material for: A novel algorithm for better distinction of primary mucinous ovarian carcinomas and mucinous carcinomas metastatic to the ovary
Source: Springer Nature journal article supplement (doi:10.1007/s00428-018-2504-0), 2019-01-10
Supplement: MOESM2 [file 16390042]

| <b>All cases</b>                                                      | <b>Variable</b> | <b>Regression coefficient (B)</b> | <b>Odds ratio</b> | <b>95% CI</b> |
|-----------------------------------------------------------------------|-----------------|-----------------------------------|-------------------|---------------|
|                                                                       | Subtype         | 3.524                             | 33.92             | 8.01-143.70   |
|                                                                       | Age             | -0.024                            | 0.976             | 0.968-0.985   |
|                                                                       | Laterality      | -1.867                            | 0.155             | 0.113-0.211   |
|                                                                       | Largest size    | 0.129                             | 1.137             | 1.115-1.160   |
| <b>After exclusion of signet ring cell histology</b>                  | Age             | -0.024                            | 0.976             | 0.968-0.985   |
|                                                                       | Laterality      | -1.858                            | 0.156             | 0.114-0.213   |
|                                                                       | Largest size    | 0.129                             | 1.137             | 1.115-1.160   |
| <b>After exclusion of signet ring cell histology and bilaterality</b> | Age             | -0.033                            | 0.968             | 0.959-0.978   |
|                                                                       | Largest size    | 0.154                             | 1.166             | 1.137-1.192   |
