# Supplementary material for: A novel algorithm for better distinction of primary mucinous ovarian carcinomas and mucinous carcinomas metastatic to the ovary
Source: Springer Nature journal article supplement (doi:10.1007/s00428-018-2504-0), 2019-01-10
Supplement: MOESM4 [file 16390042]

| Size (cm) | S(N) | Score <sub>(size)</sub> |
|-----------|------|-------------------------|
| 1         | 0,2  | 0,0                     |
| 2         | 0,3  | 1,7                     |
| 3         | 0,5  | 3,4                     |
| 4         | 0,6  | 5,1                     |
| 5         | 0,8  | 6,8                     |
| 6         | 0,9  | 8,5                     |
| 7         | 1,1  | 10,2                    |
| 8         | 1,2  | 11,9                    |
| 9         | 1,4  | 13,6                    |
| 10        | 1,5  | 15,3                    |
| 11        | 1,7  | 16,9                    |
| 12        | 1,8  | 18,6                    |
| 13        | 2,0  | 20,3                    |
| 14        | 2,2  | 22,0                    |
| 15        | 2,3  | 23,7                    |
| 16        | 2,5  | 25,4                    |
| 17        | 2,6  | 27,1                    |
| 18        | 2,8  | 28,8                    |
| 19        | 2,9  | 30,5                    |
| 20        | 3,1  | 32,2                    |
| 21        | 3,2  | 33,9                    |
| 22        | 3,4  | 35,6                    |
| 23        | 3,5  | 37,3                    |
| 24        | 3,7  | 39,0                    |
| 25        | 3,9  | 40,7                    |
| 26        | 4,0  | 42,4                    |
| 27        | 4,2  | 44,1                    |
| 28        | 4,3  | 45,8                    |
| 29        | 4,5  | 47,5                    |
| 30        | 4,6  | 49,2                    |

|    |     |       |
|----|-----|-------|
| 31 | 4,8 | 50,8  |
| 32 | 4,9 | 52,5  |
| 33 | 5,1 | 54,2  |
| 34 | 5,2 | 55,9  |
| 35 | 5,4 | 57,6  |
| 36 | 5,5 | 59,3  |
| 37 | 5,7 | 61,0  |
| 38 | 5,9 | 62,7  |
| 39 | 6,0 | 64,4  |
| 40 | 6,2 | 66,1  |
| 41 | 6,3 | 67,8  |
| 42 | 6,5 | 69,5  |
| 43 | 6,6 | 71,2  |
| 44 | 6,8 | 72,9  |
| 45 | 6,9 | 74,6  |
| 46 | 7,1 | 76,3  |
| 47 | 7,2 | 78,0  |
| 48 | 7,4 | 79,7  |
| 49 | 7,5 | 81,4  |
| 50 | 7,7 | 83,1  |
| 51 | 7,9 | 84,7  |
| 52 | 8,0 | 86,4  |
| 53 | 8,2 | 88,1  |
| 54 | 8,3 | 89,8  |
| 55 | 8,5 | 91,5  |
| 56 | 8,6 | 93,2  |
| 57 | 8,8 | 94,9  |
| 58 | 8,9 | 96,6  |
| 59 | 9,1 | 98,3  |
| 60 | 9,2 | 100,0 |
