# Supplementary material for: A novel algorithm for better distinction of primary mucinous ovarian carcinomas and mucinous carcinomas metastatic to the ovary
Source: Springer Nature journal article supplement (doi:10.1007/s00428-018-2504-0), 2019-01-10
Supplement: MOESM5 [file 16390042]

| Age (y) | S(N) | S <sub>(age)</sub> |
|---------|------|--------------------|
| 15      | -0,5 | -5,4               |
| 16      | -0,5 | -5,8               |
| 17      | -0,6 | -6,2               |
| 18      | -0,6 | -6,5               |
| 19      | -0,6 | -6,9               |
| 20      | -0,7 | -7,3               |
| 21      | -0,7 | -7,6               |
| 22      | -0,7 | -8,0               |
| 23      | -0,8 | -8,4               |
| 24      | -0,8 | -8,7               |
| 25      | -0,8 | -9,1               |
| 26      | -0,9 | -9,4               |
| 27      | -0,9 | -9,8               |
| 28      | -0,9 | -10,2              |
| 29      | -1,0 | -10,5              |
| 30      | -1,0 | -10,9              |
| 31      | -1,0 | -11,3              |
| 32      | -1,1 | -11,6              |
| 33      | -1,1 | -12,0              |
| 34      | -1,1 | -12,3              |
| 35      | -1,2 | -12,7              |
| 36      | -1,2 | -13,1              |
| 37      | -1,2 | -13,4              |
| 38      | -1,3 | -13,8              |
| 39      | -1,3 | -14,2              |
| 40      | -1,3 | -14,5              |
| 41      | -1,4 | -14,9              |
| 42      | -1,4 | -15,3              |
| 43      | -1,4 | -15,6              |
| 44      | -1,5 | -16,0              |
| 45      | -1,5 | -16,3              |
| 46      | -1,5 | -16,7              |
| 47      | -1,6 | -17,1              |
| 48      | -1,6 | -17,4              |
| 49      | -1,6 | -17,8              |
| 50      | -1,7 | -18,2              |
| 51      | -1,7 | -18,5              |
| 52      | -1,7 | -18,9              |
| 53      | -1,7 | -19,2              |
| 54      | -1,8 | -19,6              |
| 55      | -1,8 | -20,0              |
| 56      | -1,8 | -20,3              |
| 57      | -1,9 | -20,7              |
| 58      | -1,9 | -21,1              |

|    |      |       |
|----|------|-------|
| 59 | -1,9 | -21,4 |
| 60 | -2,0 | -21,8 |
| 61 | -2,0 | -22,2 |
| 62 | -2,0 | -22,5 |
| 63 | -2,1 | -22,9 |
| 64 | -2,1 | -23,2 |
| 65 | -2,1 | -23,6 |
| 66 | -2,2 | -24,0 |
| 67 | -2,2 | -24,3 |
| 68 | -2,2 | -24,7 |
| 69 | -2,3 | -25,1 |
| 70 | -2,3 | -25,4 |
| 71 | -2,3 | -25,8 |
| 72 | -2,4 | -26,2 |
| 73 | -2,4 | -26,5 |
| 74 | -2,4 | -26,9 |
| 75 | -2,5 | -27,2 |
| 76 | -2,5 | -27,6 |
| 77 | -2,5 | -28,0 |
| 78 | -2,6 | -28,3 |
| 79 | -2,6 | -28,7 |
| 80 | -2,6 | -29,1 |
| 81 | -2,7 | -29,4 |
| 82 | -2,7 | -29,8 |
| 83 | -2,7 | -30,1 |
| 84 | -2,8 | -30,5 |
| 85 | -2,8 | -30,9 |
| 86 | -2,8 | -31,2 |
| 87 | -2,9 | -31,6 |
| 88 | -2,9 | -32,0 |
| 89 | -2,9 | -32,3 |
| 90 | -3,0 | -32,7 |
| 91 | -3,0 | -33,1 |
| 92 | -3,0 | -33,4 |
| 93 | -3,1 | -33,8 |
| 94 | -3,1 | -34,1 |
| 95 | -3,1 | -34,5 |
