# Supplementary material for: A novel algorithm for better distinction of primary mucinous ovarian carcinomas and mucinous carcinomas metastatic to the ovary
Source: Springer Nature journal article supplement (doi:10.1007/s00428-018-2504-0), 2019-01-10

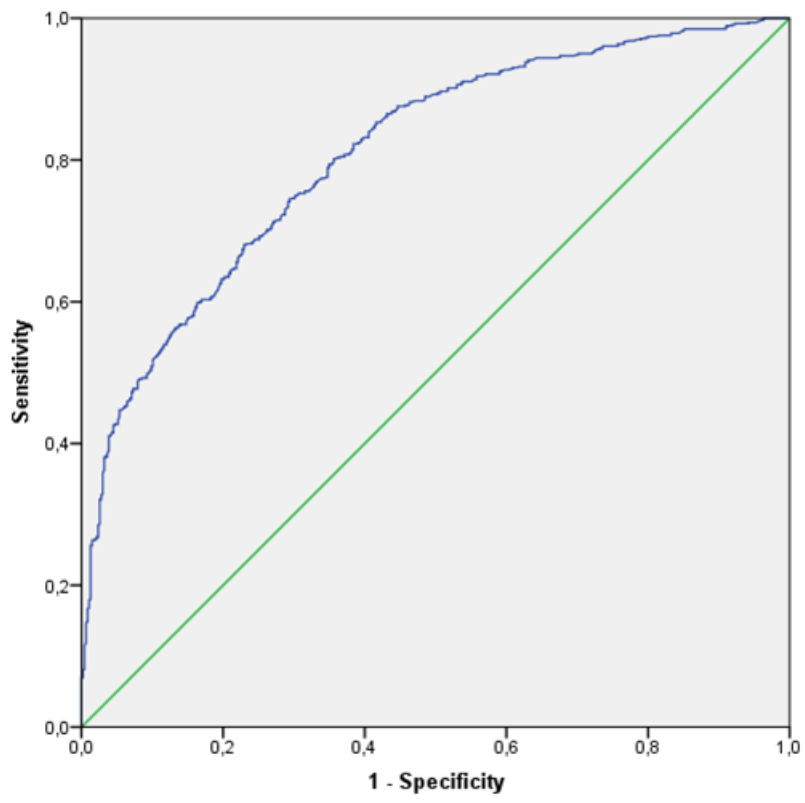

Supplement: MOESM6 [file 16390042]
